# Supplementary material for: Prevalence of Rome IV Pediatric Diagnostic Questionnaire-Assessed Disorder of Gut–Brain Interaction, Psychopathological Comorbidities and Consumption of Ultra-Processed Food in Pediatric Anorexia Nervosa
Source: MDPI journal article supplement (doi:10.3390/nu16060817), 2024-03-13
Supplement: s1 [file s1]

## **DGBIs according to the R4PDQ**

### ***Functional Dyspepsia (FD)***

Functional dyspepsia is diagnosed if child qualifies for postprandial distress syndrome or epigastric pain syndrome or both

#### *Postprandial Distress Syndrome (PDS):*

- Fullness “4 days a month” or more often, OR
- Satiation “4 days a month” or more often, AND
- Duration of upper abdominal pain or discomfort is “2 months” or longer.

#### *Epigastric Pain Syndrome (EPS):*

- Upper abdominal pain “4 days a month” or more often, OR heartburn “4 days a month” or more often, AND
- Duration of upper abdominal pain or discomfort is “2 months” or longer, AND
- Not related to a bowel movement, AND
- Not associated with change in stool form or frequency.

### ***Irritable Bowel Syndrome (IBS)***

- Abdominal pain “4 days a month” or more often, AND
- Abdominal pain is “2 months” or longer, AND
- Not exclusively associated with eating, AND
- For girls, non exclusively associated with menses, AND
- For those who use laxatives, symptoms persist with their use, AND
- At last one of the following:
  - Pain or discomfort occurring just before or after evacuation.
  - Stools are softer, creamier, or more watery than usual
  - Stools are harder or more granular than usual
  - Bowel movement is more frequent than usual
  - Bowel movement is less frequent than usual.

### ***Functional Constipation (FC)***

Must include two or more of the following:

- Two or fewer stools per week, OR
- Hard or Very hard stools OR Painful stool, OR
- Passage of very large stools, OR
- Stool retention “1 time a week” or more often, OR

- History of large fecal mass in rectum, OR
- Soiling "Once a week" or more often
- If child meets criteria for IBS, pain should improve with laxative use

*Adolescent Rumination Syndrome*

- Food come back up "Several times a week" or "Every day" AND
- Episodes occur shortly after eating, AND
- Episodes do not occur during sleep, AND
- Episodes are not accompanied by nausea or vomiting.
